# Supplementary material for: First-principles study on the structure and electronic properties of M2CSx (M = Sc, Ti, Y, Zr and Hf, x = 1, 2)
Source: Royal Society of Chemistry journal article supplement (doi:10.1039/d3ra03340f), 2023-01-01
Supplement: d3ra03340f1.pdf [file d3ra03340f1.pdf]

## First-principles study on the structure and electronic properties of $M_2CS_x$ (M=Sc, Ti, Y, Zr and Hf, $x=1, 2$ )

Huaijin Zhu<sup>a,b</sup>, Nianxiang Qiu<sup>b\*</sup>, Gang Fang<sup>b</sup>, Shiyu Du<sup>b,c,d,e\*</sup>

<sup>a</sup>Faculty of Electrical Engineering and Computer Science, Ningbo University, Ningbo, Zhejiang 351201, China

<sup>b</sup>Engineering Laboratory of Advanced Energy Materials, Ningbo Institute of Materials Technology and Engineering, Chinese Academy of Sciences, Ningbo, Zhejiang 315201, P. R. China.

<sup>c</sup>School of Materials Science and Engineering, China University of Petroleum (East China), Qingdao, 266580, China

<sup>d</sup>School of Computer Science, China University of Petroleum (East China), Qingdao, 266580, China

<sup>e</sup>Milky-Way Sustainable Energy Ltd, Zhuhai, China

\*Corresponding Authors: E-mail: [qiunianxiang@nimte.ac.cn](mailto:qiunianxiang@nimte.ac.cn) and [dushiyu@nimte.ac.cn](mailto:dushiyu@nimte.ac.cn)

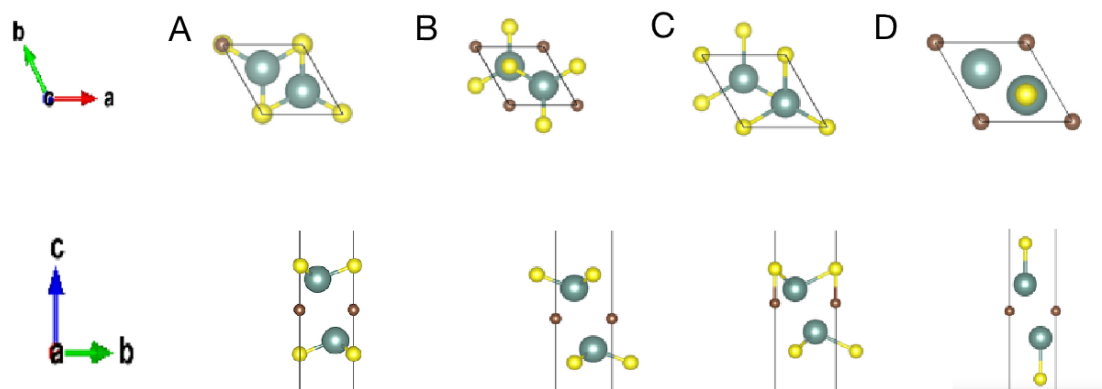

**Figure S1.** The top and side views of six possible configurations (**A-D**) of stoichiometric  $M_2CS_2$  (M=Sc, Ti, Y, Zr and Hf). Cyan, yellow and brown spheres represent M, S and C atoms, respectively. **A:** The S layers on both sides are directly projected to the middle C layer, **B:** The S layers on both sides are directly projected to the bottom M layer, **C:** The S layer on one side is directly projected to the middle C layer and the S layer on the other side is directly projected to the bottom M layer, **D:** The S atoms on both sides are located on the top of M atoms.

**Table S1.** The calculated total energies of the four possible configurations of  $M_2CS_2$ .

|            | A      | B      | C      | D      |
|------------|--------|--------|--------|--------|
| $Sc_2CS_2$ | -35.83 | -35.02 | -36.17 | -32.27 |
| $Ti_2CS_2$ | -38.88 | -40.07 | -39.38 | -36.01 |
| $Y_2CS_2$  | -36.39 | -36.05 | -36.46 | -35.99 |
| $Zr_2CS_2$ | -41.52 | -41.96 | -41.49 | -30.53 |
| $Hf_2CS_2$ | -43.68 | -44.88 | -44.36 | -40.10 |

**Table S2.** The calculated total energies (in eV) of fully optimized  $2 \times 2 \times 1$  supercells of the most stable configurations of  $Sc_2CS_2$  and  $Y_2CS_2$  with and without dipole correction in this study, as well

as the dipole-corrected total energies of the corresponding structures reported by Zhang *et al.* (*Nanoscale* 2020, 12 (41), 21291) for comparison.

|                                 | Configuration    | Total energy in this study | Dipole-corrected total energy in this study | Dipole-corrected total energy by Zhang <i>et al.</i> |
|---------------------------------|------------------|----------------------------|---------------------------------------------|------------------------------------------------------|
| Sc <sub>2</sub> CS <sub>2</sub> | type-B           | -144.68                    | 144.69                                      | 142.16                                               |
|                                 | distorted type-B | -144.70                    |                                             |                                                      |
| Y <sub>2</sub> CS <sub>2</sub>  | type-B           | -145.83                    | 145.83                                      | -143.99                                              |
|                                 | distorted type-B | -145.84                    |                                             |                                                      |

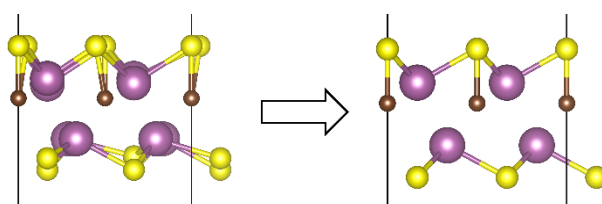

**Figure S2.** Distorted type-B Sc<sub>2</sub>CS<sub>2</sub> structure before and after optimization.

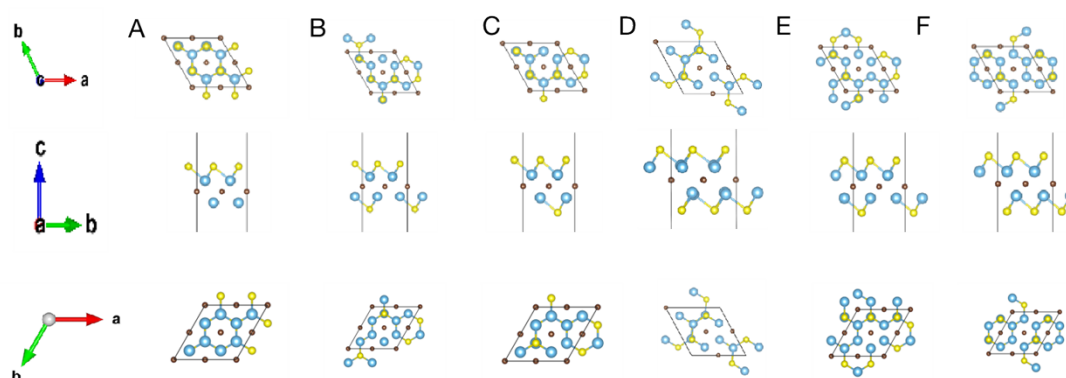

**Figure S3.** The top and side views of six possible configurations (**A-F**) of nonstoichiometric M<sub>2</sub>CS (M=Ti, Zr, and Hf) created by *disorder* code based on the stable configuration of M<sub>2</sub>CS<sub>2</sub> in **Figure S1 B**. The bright blue, yellow and brown balls indicate M, S and C atoms, respectively. **A**: All four S atoms on one side of the M<sub>2</sub>CS supercell are removed, **B** and **C**: One S atom is removed from one side of the M<sub>2</sub>CS supercell, while three S atoms are removed from the other side. It leaves the only S atom on one side close to the only S vacancy on the other side in configuration **B**, and far from the vacancy in configuration **C**. **D**, **E** and **F**: The four S atoms on both sides of the M<sub>2</sub>CS supercell are uniformly removed. The remaining S atoms on both sides are arranged in stripes. The stripe-like sulfur terminations on both sides are parallel, and in configuration **D**, the stripe-like sulfur terminations on one side are directly below those on the other side, otherwise it is configuration **F**. In configuration **E**, the strip-like sulfur groups on both sides appear to cross.

**Table S3.** The calculated total energies of the six possible configurations of nonstoichiometric M<sub>2</sub>CS (M=Ti, Zr, and Hf).

|                    | A       | B       | C       | D       | E       | F       |
|--------------------|---------|---------|---------|---------|---------|---------|
| Ti <sub>2</sub> CS | -131.11 | -133.62 | -133.48 | -134.86 | -134.3  | -134.30 |
| Zr <sub>2</sub> CS | -137.50 | -139.73 | -139.59 | -140.58 | -140.40 | -140.27 |

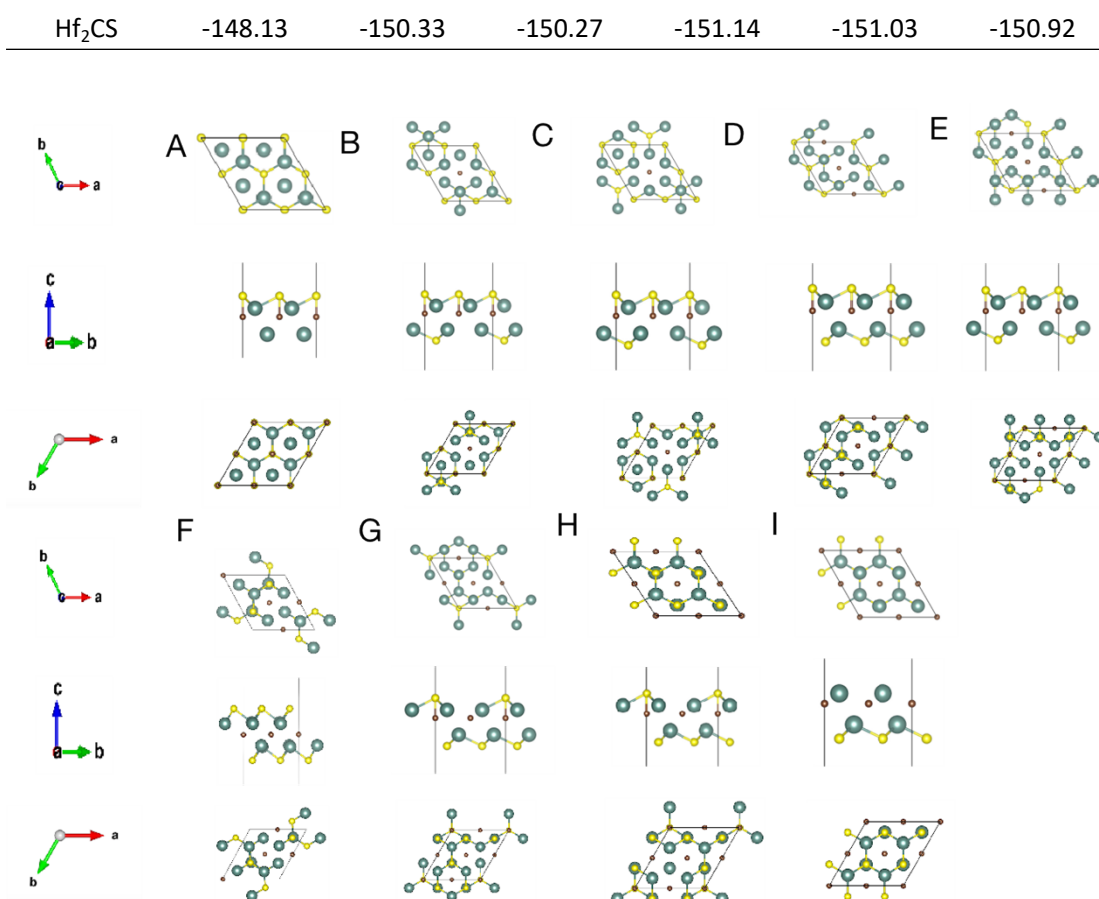

**Figure S4.** The top and side views of nine possible configurations (A-I) of nonstoichiometric Sc<sub>2</sub>CS and Y<sub>2</sub>CS based on the stable configuration of Sc<sub>2</sub>CS<sub>2</sub> and Y<sub>2</sub>CS<sub>2</sub> in **Figure S1 C**. The bright blue, yellow and brown balls indicate M, S and C atoms, respectively. **A:** All the four S atoms on the side of the M<sub>2</sub>CS supercell projected to the bottom M layer are removed, **B** and **C:** One S atom on the side of the M<sub>2</sub>CS supercell projected to the middle C layer is removed, while three S atoms on the side of the M<sub>2</sub>CS supercell projected to the bottom M layer are removed. It leaves the only S atom on one side close to the only S vacancy on the other side in configuration **B**, and far from the vacancy in configuration **C**. **D, E** and **F:** The four S atoms on both sides of the M<sub>2</sub>CS supercell are uniformly removed. The remaining S atoms on both sides are arranged in stripes. The stripe-like sulfur terminations on both sides are parallel, and in configuration **F**, the distance between the two stripe-like S groups is the shortest in the xy plane, otherwise it is configuration **D**. In configuration **E**, the strip-like sulfur groups on both sides appear to cross. **G** and **H:** Three S atoms on the side of the M<sub>2</sub>CS supercell projected to the middle C layer is removed, while one S atom on the side of the M<sub>2</sub>CS supercell projected to the bottom M layer are removed. It leaves the only S atom on one side close to the only S vacancy on the other side in configuration **G**, and far from the

vacancy in configuration H. I: All the four S atoms on the side of the  $M_2CS$  supercell projected to the middle C layer are removed.

**Table S4.** The calculated total energies of the nine possible configurations of nonstoichiometric  $Y_2CS$  and  $Y_2CS$ .

|          | A       | B       | C       | D       | E       | F       | G       | H       | I       |
|----------|---------|---------|---------|---------|---------|---------|---------|---------|---------|
| $Sc_2CS$ | -117.24 | -119.88 | -119.52 | -120.75 | -120.88 | -121.32 | -120.31 | -118.72 | -118.57 |
| $Y_2CS$  | -117.94 | -120.05 | -119.83 | -120.55 | -120.85 | -121.28 | -118.95 | -118.97 | -119.12 |

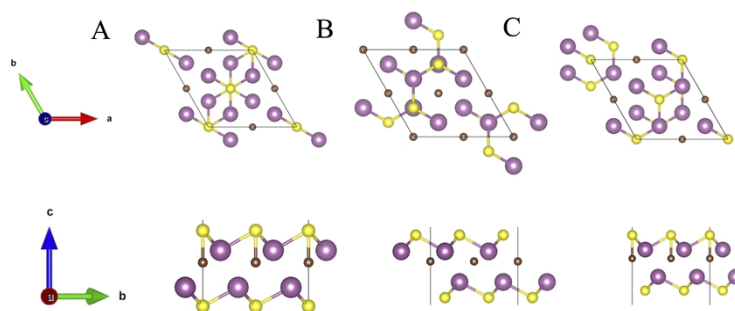

**Figure S5.** The most stable configuration of  $M_2CS$  ( $M=Sc, Y, Ti, Zr,$  and  $Hf$ ) derived from  $M_2CS_2$  configurations A, B, and C in **Figure S1**, respectively, with strip-like sulfur terminations on both sides.

**Table S5.** The calculated total energies of the most stable configurations of  $M_2CS$  ( $M=Sc, Y, Ti, Zr,$  and  $Hf$ ) derived from  $M_2CS_2$  configurations C, A, and B in **Figure S1**, respectively.

|          | A       | B       | C       |
|----------|---------|---------|---------|
| $Sc_2CS$ | -117.63 | -121.42 | -121.31 |
| $Ti_2CS$ | -132.86 | -134.86 | -128.41 |
| $Y_2CS$  | -117.28 | -121.30 | -121.28 |
| $Zr_2CS$ | -139.44 | -140.58 | -133.48 |
| $Hf_2CS$ | -149.79 | -151.13 | -150.33 |

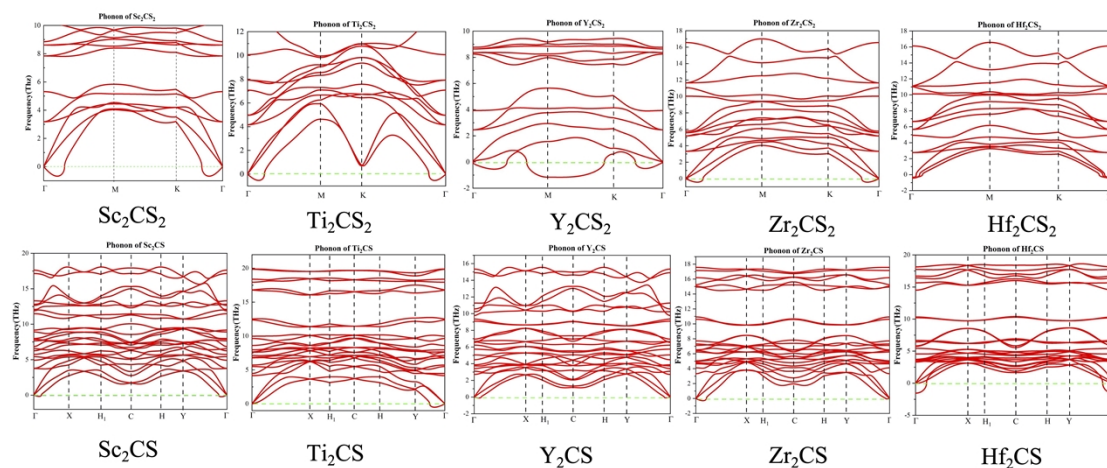

**Figure S6.** The calculated phonon dispersions of the  $M_2CS_x$  ( $M=Sc, Ti, Y, Zr, \text{ and Hf}, x=1, 2$ ).

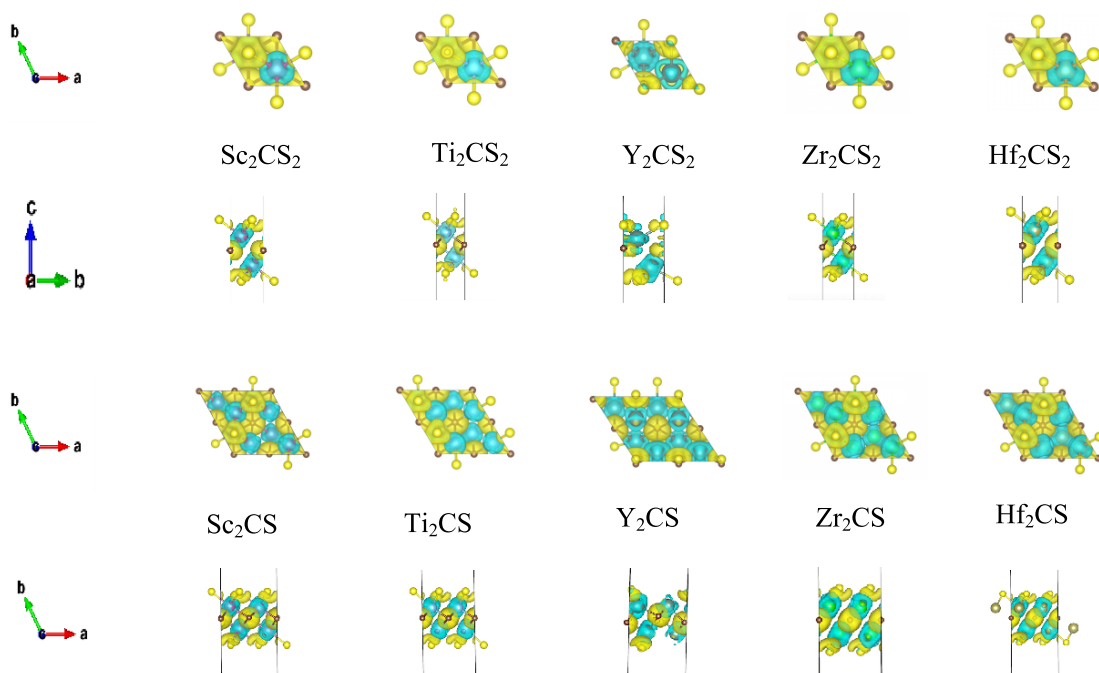

**Figure S7.** The charge density differences of  $M_2CS_x$  ( $M=Sc, Y, Ti, Zr \text{ and Hf}, x=1, 2$ ).
